# Supplementary material for: Entomopathogens and Parasitoids Allied in Biocontrol: A Systematic Review
Source: MDPI journal article supplement (doi:10.3390/pathogens12070957), 2023-07-20
Supplement: s1 [file s1]

# Entomopathogens and parasitoids allied in biocontrol: a systematic review

Janique Koller <sup>1,3</sup>, Louis Sutter <sup>1</sup>, J  r  my Gonthier <sup>2</sup>, Jana Collatz <sup>2</sup> and Lindsey Norgrove <sup>3,\*</sup>

<sup>1</sup> Agroscope, Plant-Production Systems, Route des Eterpys 18, 1964 Conthey, Switzerland

<sup>2</sup> Agroscope, Agroecology and Environment, Reckenholzstrasse 191, 8046 Zurich, Switzerland

<sup>3</sup> Bern University of Applied Sciences (BFH), School of Agricultural, Forest and Food Science (HAFL), L  nggasse 85, 3052 Zollikofen, Bern, Switzerland

\* Correspondence: lindsey.norgrove@bfh.ch

## PRISMA 2020 Flow diagram

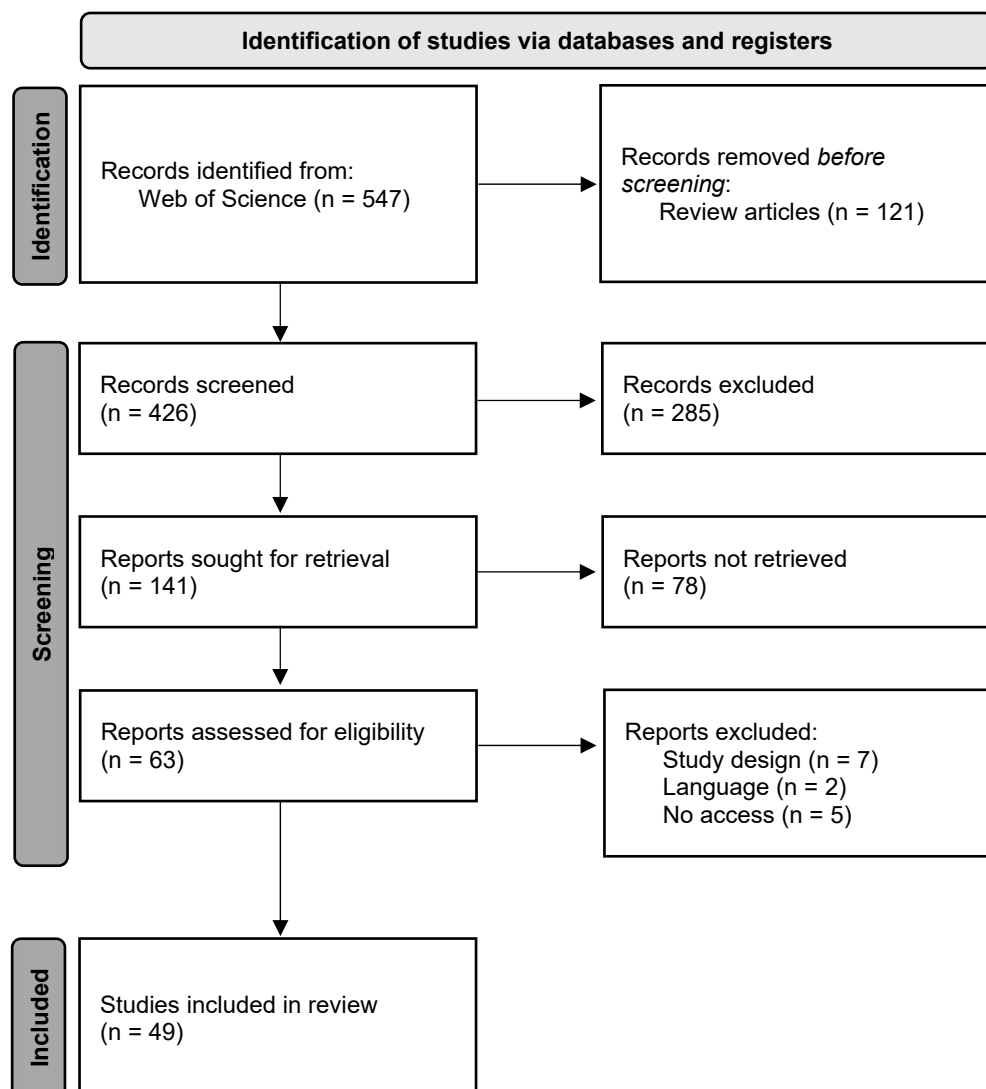

**Figure S1** PRISMA flow diagram detailing screening process of articles included in meta-analysis. Procedure adapted from Page et al. 2021.
